# Supplementary material for: Effects of different exposed crystal surfaces of CeO2 loaded on an MnO2/X catalyst for the NH3-SCR reaction
Source: Royal Society of Chemistry journal article supplement (doi:10.1039/d2ce00570k), 2022-01-01
Supplement: d2ce00570k1.pdf [file d2ce00570k1.pdf]

## Effect of different exposed crystal surface of CeO<sub>2</sub> loading on MnO<sub>2</sub>/X catalyst for NH<sub>3</sub>-SCR reaction

Shihao Wang <sup>a</sup>, Xiaodi Li <sup>a</sup>, Shan Ren <sup>a,\*</sup>, Xiangdong Xing <sup>b</sup>, Lin Chen <sup>a</sup>, Jie Yang <sup>a,c</sup>,

Manyi Liu <sup>a</sup>, Yixin Xie <sup>a</sup>

<sup>a</sup> College of Materials Science and Engineering, Chongqing University, Chongqing 400044,

China

<sup>b</sup> School of Metallurgical Engineering, Xi'an University of Architecture and Technology, Xi'an

710055, ShanXi, P.R. China

<sup>c</sup> Paul Scherrer Institut, CH-5232 Villigen PSI, Switzerland

\* Corresponding author email: shan.ren@cqu.edu.cn(S. Ren).

**Table S1** Comparison of NO<sub>x</sub> conversion with the literatures related with Mn-based catalysts

| Catalysts              | Reaction condition                                                                                               | NO <sub>x</sub> conversion | Reference |
|------------------------|------------------------------------------------------------------------------------------------------------------|----------------------------|-----------|
| Mn-Ce <sub>NC</sub> /X | NO = NH <sub>3</sub> = 500 ppm,<br>O <sub>2</sub> = 11 %, GHSV = 36000 h <sup>-1</sup> ,<br>flow rate 300 mL/min | 85.9 %<br>(@ 125 °C)       | This work |
| Mn-Ce <sub>NP</sub> /X | NO = NH <sub>3</sub> = 500 ppm,<br>O <sub>2</sub> = 11 %, GHSV = 36000 h <sup>-1</sup> ,<br>flow rate 300 mL/min | 74.5 %<br>(@125 °C)        | This work |
| Mn-Ce <sub>NR</sub> /X | NO = NH <sub>3</sub> = 1000 ppm,<br>O <sub>2</sub> = 11 %, GHSV = 36000 h <sup>-1</sup> ,                        | 79.16 %<br>(@ 125 °C)      | This work |

| Catalysts                        | Reaction condition                                                                                                | NO <sub>x</sub> conversion | Reference |
|----------------------------------|-------------------------------------------------------------------------------------------------------------------|----------------------------|-----------|
|                                  | flow rate 300 mL/min                                                                                              |                            |           |
| Mn/X                             | NO = NH <sub>3</sub> = 500 ppm,<br>O <sub>2</sub> = 11 %, GHSV = 36000 h <sup>-1</sup> ,<br>flow rate 300 mL/min  | 81.4 %<br>(@ 125 °C)       | This work |
| MnO <sub>2</sub>                 | NO = NH <sub>3</sub> = 500 ppm,<br>O <sub>2</sub> = 5 %, GHSV = 30000 h <sup>-1</sup> , flow rate<br>500 mL/min   | 65 %<br>(@ 125 °C)         | [1]       |
| MnTiO <sub>x</sub>               | NO = NH <sub>3</sub> = 1000 ppm<br>O <sub>2</sub> = 5 %, GHSV = 30000 h <sup>-1</sup> , flow rate<br>500 mL/min   | 74 %<br>(@ 125 °C)         | [1]       |
| Ho-Mn/TiO <sub>2</sub>           | NO = NH <sub>3</sub> = 500 ppm,<br>O <sub>2</sub> = 5 %, GHSV = 20000 h <sup>-1</sup> ,<br>flow rate 100 mL/min   | 84.5 %<br>(@ 125 °C)       | [2]       |
| MnFeO <sub>x</sub>               | NO = NH <sub>3</sub> = 500 ppm,<br>O <sub>2</sub> = 5 %, GHSV = 36000 h <sup>-1</sup> ,<br>flow rate 500 mL/min   | 40 %<br>(@ 125 °C)         | [3]       |
| MnDyO <sub>x</sub>               | NO = NH <sub>3</sub> = 500 ppm,<br>O <sub>2</sub> = 5 %, GHSV = 36000 h <sup>-1</sup> ,<br>flow rate 500 mL/min   | 62%<br>(@ 300 °C)          | [3]       |
| MnGrO <sub>x</sub>               | NO = NH <sub>3</sub> = 500 ppm,<br>O <sub>2</sub> = 5 %, GHSV = 36000 h <sup>-1</sup> ,<br>flow rate 500 mL/min,  | 71 %<br>(@ 125 °C)         | [4]       |
| MnEu/TiO <sub>2</sub>            | NO = NH <sub>3</sub> = 600 ppm,<br>O <sub>2</sub> = 5 %, GHSV = 108000 h <sup>-1</sup> ,<br>flow rate 500 mL/min, | 79 %<br>(@ 125 °C)         | [5]       |
| MnNi <sub>2</sub> O <sub>4</sub> | NO = NH <sub>3</sub> = 600 ppm,                                                                                   | 60 %                       | [6]       |

| <b>Catalysts</b>                    | <b>Reaction condition</b>                                                                                        | <b>NO<sub>x</sub><br/>conversion</b> | <b>Reference</b> |
|-------------------------------------|------------------------------------------------------------------------------------------------------------------|--------------------------------------|------------------|
|                                     | O <sub>2</sub> = 5 %, GHSV = 50000 h <sup>-1</sup> ,<br>flow rate 600 mL/min,<br>NO = NH <sub>3</sub> = 500 ppm, | (@ 125 °C)<br><br>85 %               |                  |
| MnxCo <sub>3-x</sub> O <sub>4</sub> | O <sub>2</sub> = 5 %, GHSV = 23000 h <sup>-1</sup> ,<br>flow rate 260 mL/min,                                    | (@ 125 °C)                           | [7]              |

## Reference:

- [1] S. A. Shu, J. Guo, J. A. Li, N. Fang, S.C. Yuan, *Journal of the Taiwan Institute of Chemical Engineers*, 2019, **100**, 168-177.
- [2] Y. Zhang, P. Wu, G. Li, K. Zhuang, T. Huang. *Environmental Science and Pollution Research*, 2020, **21**, 1-11.
- [3] C. Gao, B. Xiao, J. W. Shi, C. He, C. Niu, *Journal of Catalysis*, 2019, **380**, 55-67.
- [4] G. Chen, J. W. Shi, Z. Fan, Y. Yu, C. Niu, *Fuel Processing Technology*, 2017, **167**, 322-333.
- [5] G. Ge, J. W. Shi, Z. Fan, C. Niu, *Chemical Engineering Journal*, 2017, **325**, 91-100.
- [6] X. Hu, L. Huang, J. Zhang, H. Li, K. Zha, L. Y. Shi, *Journal of Materials Chemistry A*, 2018, **6**, 2951-2963.
- [7] Z. Y. Wang, R. T. Guo, X. Shi, X. Y. Liu, W. G. Pan, *Chemical Engineering Journal*, 2020, **381**, 122753.
